# Supplementary material
Source: PubMed Central journal article supplement (PMC6126719)
Supplement: pnas.1801774115.sapp.pdf [file pnas.1801774115.sapp.pdf]

## Supplementary Information:

**Table S1. Data collection and refinement statistics.**

|                                  |                          |
|----------------------------------|--------------------------|
| Wavelength, Å                    | 1.115                    |
| Resolution range, Å              | 29.76 - 3.0 (3.107 -3.0) |
| Space group                      | P 6 <sub>5</sub> 2 2     |
| Unit cell, a, c, Å               | 153.6, 193.7             |
| Total reflections                | 327045 (32638)           |
| Unique reflections               | 27582 (2689)             |
| Multiplicity                     | 11.9 (12.1)              |
| Completeness, %                  | 98 (100)                 |
| Mean I/σ(I)                      | 12.4 (0.34)              |
| Wilson B-factor, Å <sup>2</sup>  | 112.21                   |
| R-merge                          | 0.204 (8.4)              |
| R-measured                       | 0.213 (8.8)              |
| CC1/2                            | 0.99 (0.11)              |
| CC*                              | 1 (0.44)                 |
| Reflections used in refinement   | 27009 (2197)             |
| Reflections used for R-free      | 1802 (188)               |
| R-work                           | 0.276 (0.55)             |
| R-free                           | 0.295 (0.50)             |
| CC (work)                        | 0.88 (0.180)             |
| CC (free)                        | 0.93 (0.194)             |
| Number of non-hydrogen atoms     | 4132                     |
| macromolecules                   | 4090                     |
| NPG                              | 42                       |
| Protein residues                 | 521                      |
| RMSD (bond lengths), Å           | 0.005                    |
| RMSD (bond angles), °            | 0.73                     |
| Ramachandran favored, %          | 91.8                     |
| Ramachandran allowed, %          | 6.8                      |
| Ramachandran outliers, %         | 1.4                      |
| Rotamer outliers, %              | 12.0                     |
| Clash score                      | 5.1                      |
| Average B-factor, Å <sup>2</sup> | 116.4                    |
| macromolecules, Å <sup>2</sup>   | 116.3                    |
| NPG, Å <sup>2</sup>              | 124.6                    |

Statistics for the highest-resolution shell are shown in parentheses.

**Table S2. Hydrogen bonds between LacY<sub>WW</sub> and Nb9047**

| LacY <sub>WW</sub><br>atom 1, chain A | Nb9047<br>atom 2, chain B              | Distance<br>Å |
|---------------------------------------|----------------------------------------|---------------|
| O (peptide bond), <b>Lys42</b>        | HD21, <b>Asn102</b> , CDR3             | 2.6           |
| HD22, <b>Asn245</b>                   | O (peptide bond), <b>Gly103</b> , CDR3 | 2.5           |
| HG, <b>Ser249</b>                     | OE1, <b>Gln99</b> , CDR3               | 2.4           |
| O (peptide bond), <b>Ser249</b>       | HH22, <b>Arg52</b> , CDR2              | 2.3           |
| O (peptide bond), <b>Phe251</b>       | H (peptide bond), <b>Tyr106</b> , CDR3 | 2.4           |
| O (peptide bond), <b>Ala252</b>       | H (peptide bond), <b>Ser107</b> , CDR3 | 2.4           |
| NH (peptide bond), <b>Gly254</b>      | O (peptide bond), <b>Gly104</b> , CDR3 | 2.5           |
| NH (peptide bond), <b>Gly254</b>      | OE1, <b>Glu108</b> , CDR3              | 2.0           |
| O (peptide bond), <b>Thr310</b>       | NE, <b>Arg 57</b> , CDR2               | 2.0           |
| OG1, <b>Ser311</b>                    | NH2, <b>Arg 57</b> , CDR2              | 2.9           |
| OE1, <b>Gln379</b>                    | HE1, <b>Trp53</b> , CDR2               | 2.5           |
| H (peptide bond), <b>Gly380</b>       | OG1, <b>Thr31</b> , CDR1               | 1.9           |

**Table S3. Bond distances in sugar-binding site of LacY<sub>Ww</sub> with bound NPG**

| Atom 1<br>Protein<br>sidechain | Atom 2<br>NPG or<br>protein sidechain | Distance, Å          |                                              |
|--------------------------------|---------------------------------------|----------------------|----------------------------------------------|
|                                |                                       | Current<br>structure | Structure without Nb<br>PDB ID 4ZYZ, chain A |
| Arg144 NH1                     | NPG O6                                | 2.6                  | 3.0                                          |
| Arg144 NH2                     | NPG O5                                | 2.8                  | 3.6                                          |
| Glu126 OE2                     | Arg144 NH2                            | 3.3                  | 3.2                                          |
| Glu126 OE1                     | Tyr 350 OH                            | 2.4                  | 2.4                                          |
| Glu269 OE2                     | NPG O4                                | 3.5                  | 3.2                                          |
| Glu269 OE1                     | NPG O4                                | 2.9                  | 2.9                                          |
| Glu269 OE2                     | NPG O3                                | 3.1                  | 2.8                                          |
| Glu269 OE1                     | Asn272 ND2                            | 3.0                  | 3.1                                          |
| Asn272 ND2                     | NPG O4                                | 3.1                  | 3.3                                          |
| His322 NE2                     | NPG O3                                | 2.8                  | 3.1                                          |
| His322 NE2                     | NPG O2                                | 3.9                  | 3.4                                          |
| His322 ND1                     | Tyr236 O                              | 2.9                  | 3.3                                          |
| His322 ND1                     | Glu325 OE2                            | 3.4                  | 3.2                                          |
| Trp151 CD2                     | NPG C5                                | 3.5                  | 3.5                                          |
| Met23 CE1                      | NPG C9                                | 3.2                  | 4.7                                          |
| Cys148 SG                      | NPG O6                                | 3.6                  | 3.1                                          |

**Fig. S1.** Overall structure of the LacY<sub>WW</sub>/NPG/Nb9047 complex. A. Crystal of LacY<sub>WW</sub>-NPG-Nb9047. B. Side view of the LacY<sub>WW</sub>/NPG/Nb9047 complex. The model is presented as a cartoon rainbow-colored from blue to orange for the backbone of LacY<sub>WW</sub> (from N- to C-terminus) with red-colored Nb9047 attached to the periplasmic side of LacY<sub>WW</sub>. NPG located in the sugar-binding site is shown as purple sticks. The molecule of detergent n-nonyl- $\beta$ -D-glucoside is positioned in the vicinity of TM3 and shown as brown sticks. Electron density ( $2F_o-F_c$ ) map is contoured at  $1\sigma$  and represented by light orange mesh around the model.

**Fig. S2.** Effect of Nb binding on the structure of LacY<sub>WW</sub>. Cartoon on the **left** shows comparison of main-chains in the LacY<sub>WW</sub>/NPG/Nb9047 complex and the previously determined outward-open structure of NPG-bound LacY<sub>WW</sub> (with Nb and NPG removed). The LacY<sub>WW</sub>/NPG/Nb9047 complex is rainbow-colored from blue to orange for TM1 to TM12, and the NPG-bound LacY<sub>WW</sub> (PDB ID code 4ZYR) is cyan-colored. The plot on the **right** delineates differences in positions of C $\alpha$  atoms for each amino acid in the aligned structures (RMSD = 0.9Å). Distances between C $\alpha$  atoms are displayed for transmembrane helices and connecting loops only, including residues 9 - 188 and 221 - 401 in the N- and C-terminal halves of LacY<sub>WW</sub>. Amino acids in loop 6-7 and in N- and C-terminals are omitted. Red and blue dots represent residues in periplasmic and cytoplasmic loops, respectively.

**Fig. S3.** The crossed-eyes stereo view of the interface in LacY<sub>WW</sub>/Nb9047 complex. Residues in LacY<sub>WW</sub> are shown as sticks (carbon in green, nitrogen in blue, oxygen in red, sulfur in light yellow, and hydrogen in white). Residues in Nb9047 are represented as sticks (carbon in yellow, nitrogen in blue, oxygen in red, sulfur in light yellow, and hydrogen in white). A transparent surface is shown around LacY<sub>WW</sub>. Broken lines present hydrogen bonds. Interactions of LacY<sub>WW</sub> with CDR1, CDR2, and CDR3, are shown on panels A, B, and C, respectively.

**Fig. S4.** Schematic representation of hydrogen-bond connections between CDR loops of Nb9047 (red) and amino acid residues of LacY<sub>WW</sub> (green) in the X-ray structure of the LacY<sub>WW</sub>/NPG/Nb9047 complex. Contacts of neighboring residues in CDR3 loop (Asn102 and Gly103) with Lys42 (TM2) and Asn245 (TM7) link N- and C-terminal six-helical halves in LacY (chain of contacts: Lys42 - Asn102 - Gly103 - Asn245). See [Table S2](#) and [Fig. S3](#) for details.

**Fig. S5.** The NPG binding site in the LacY<sub>WW</sub>/Nb9047/NPG complex. ( $2F_o-F_c$ ) electron density map is contoured at  $1\sigma$ . NPG is represented by sticks with carbon atoms colored orange, and residues in LacY<sub>WW</sub> shown as sticks with carbon atoms in yellow, nitrogen in blue, oxygen in red, and hydrogen in white. Broken lines represent hydrogen bonds.

**Fig. S6.** Schematic representation of contacts between NPG and amino acid residues in the LacY<sub>WW</sub>/NPG/Nb9047 complex. Carbon and oxygen atoms in NPG are labeled with blue and cyan marks, respectively. Amino acid residues of LacY<sub>WW</sub> are shown in green. Bond distances in Å are indicated. See [Table S3](#) for details.

**Fig. S7.** Accessibility of galactoside-binding site in LacY and effect of Nb9047. NPG binding rates ( $k_{\text{obs}}$ ) were directly measured with LacY<sub>WW</sub> or LacY<sub>WW</sub>/Nb9047 complex (black or red circles, respectively) and with WT LacY or WT LacY/Nb9047 complex (green or red triangles, respectively) in 50 mM Na-phosphate buffer/0.02% DDM (pH 7.5) as change in Trp fluorescence due to FRET from Trp151 in binding site to NPG, as described (16). The values of association rate constant ( $k_{\text{on}}$ ) for NPG, estimated from linear concentration dependencies of binding rates, are 5.7 or 5.8  $\mu\text{M}^{-1} \text{s}^{-1}$  for LacY<sub>WW</sub> in the absence or presence of Nb9047, respectively, and 0.2 and 6.8  $\mu\text{M}^{-1} \text{s}^{-1}$  for WT LacY in the absence or presence of Nb9047, respectively. Dissociation rate constant ( $k_{\text{off}}$ ) is 31  $\text{s}^{-1}$  for LacY<sub>WW</sub> and its complex with Nb9047, 32  $\text{s}^{-1}$  for WT LacY/Nb9047 complex, and 41  $\text{s}^{-1}$  for WT LacY without Nb (open symbols).

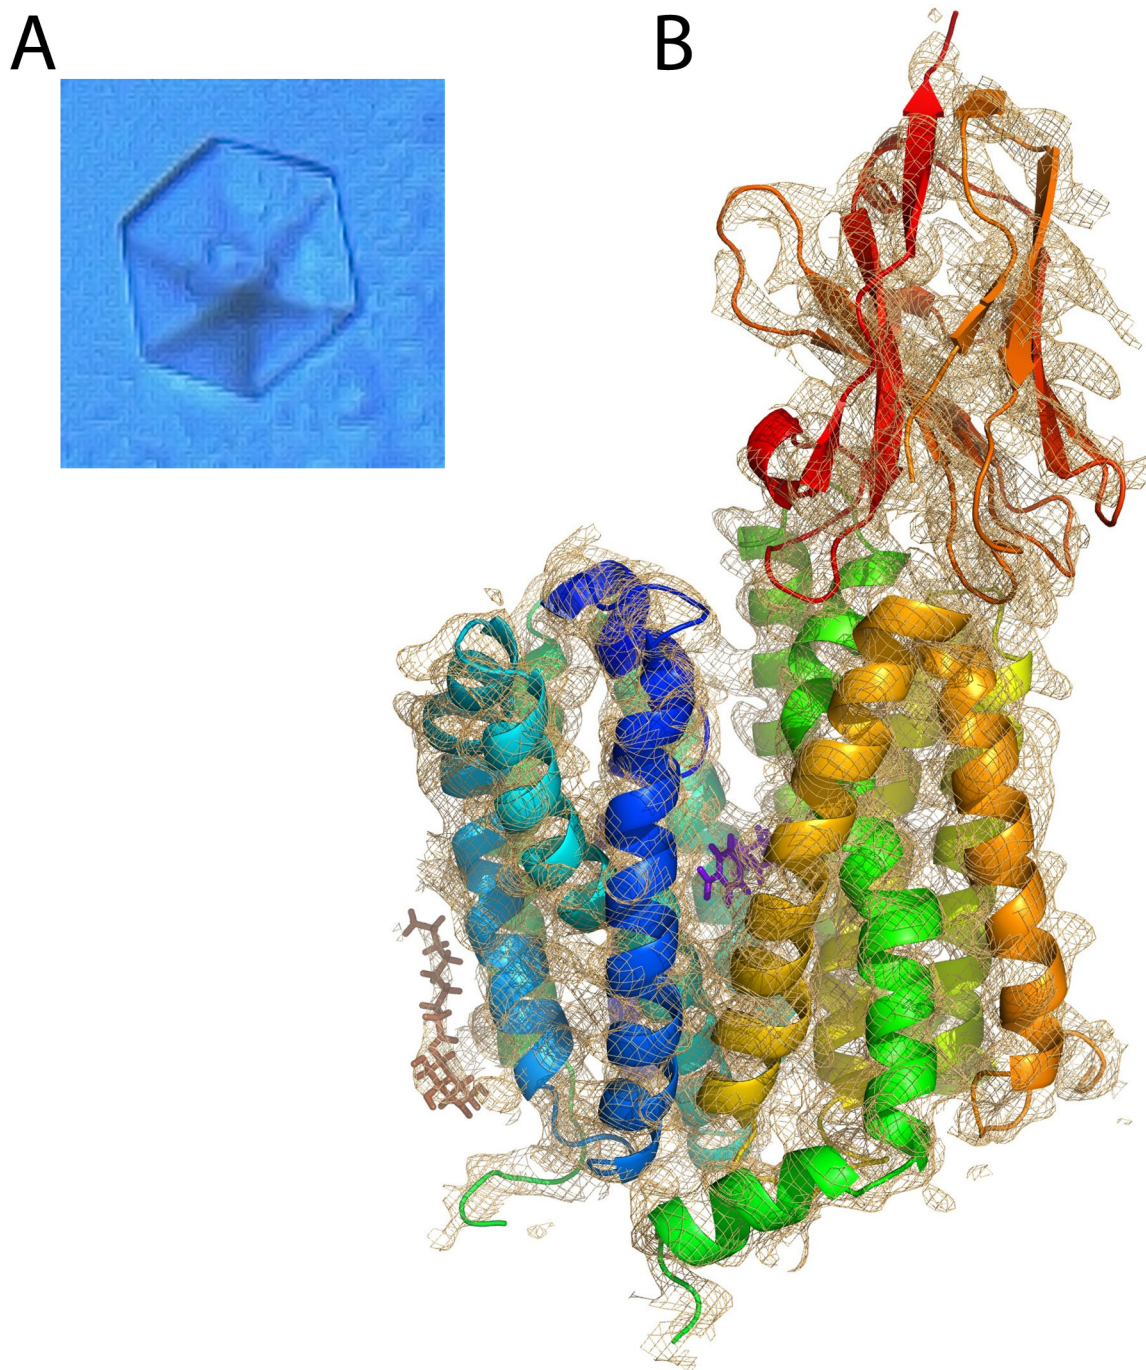

Fig S1

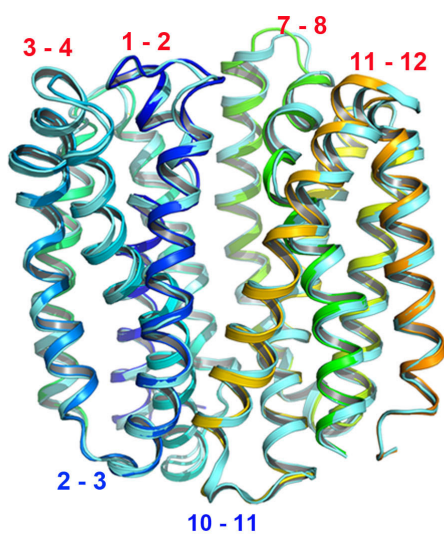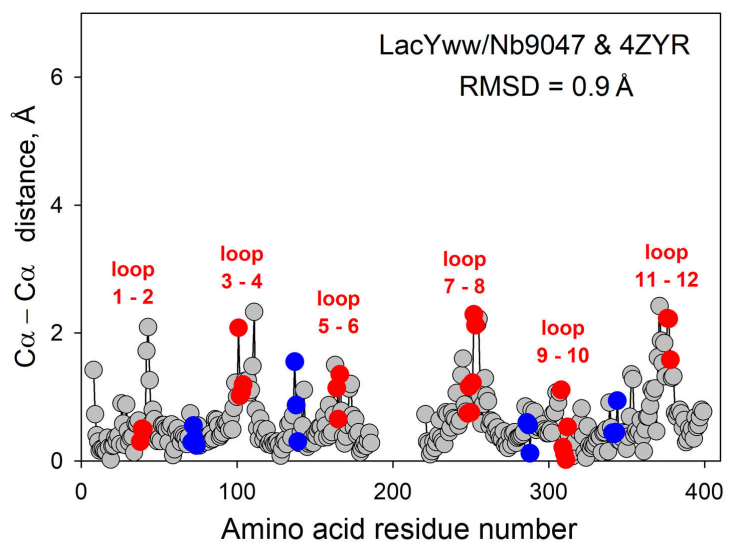

Fig S2

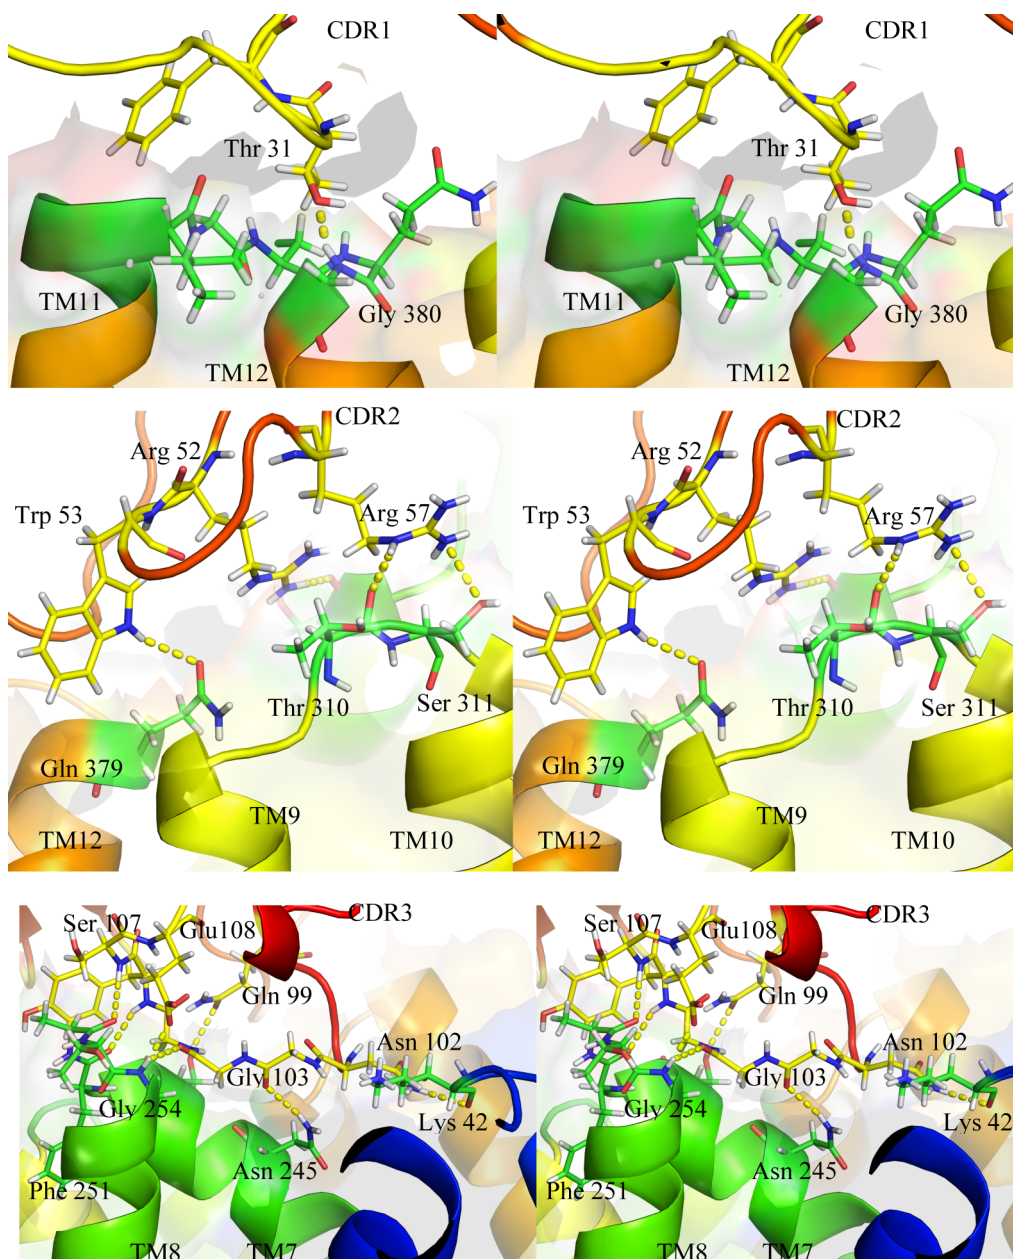

Fig S3



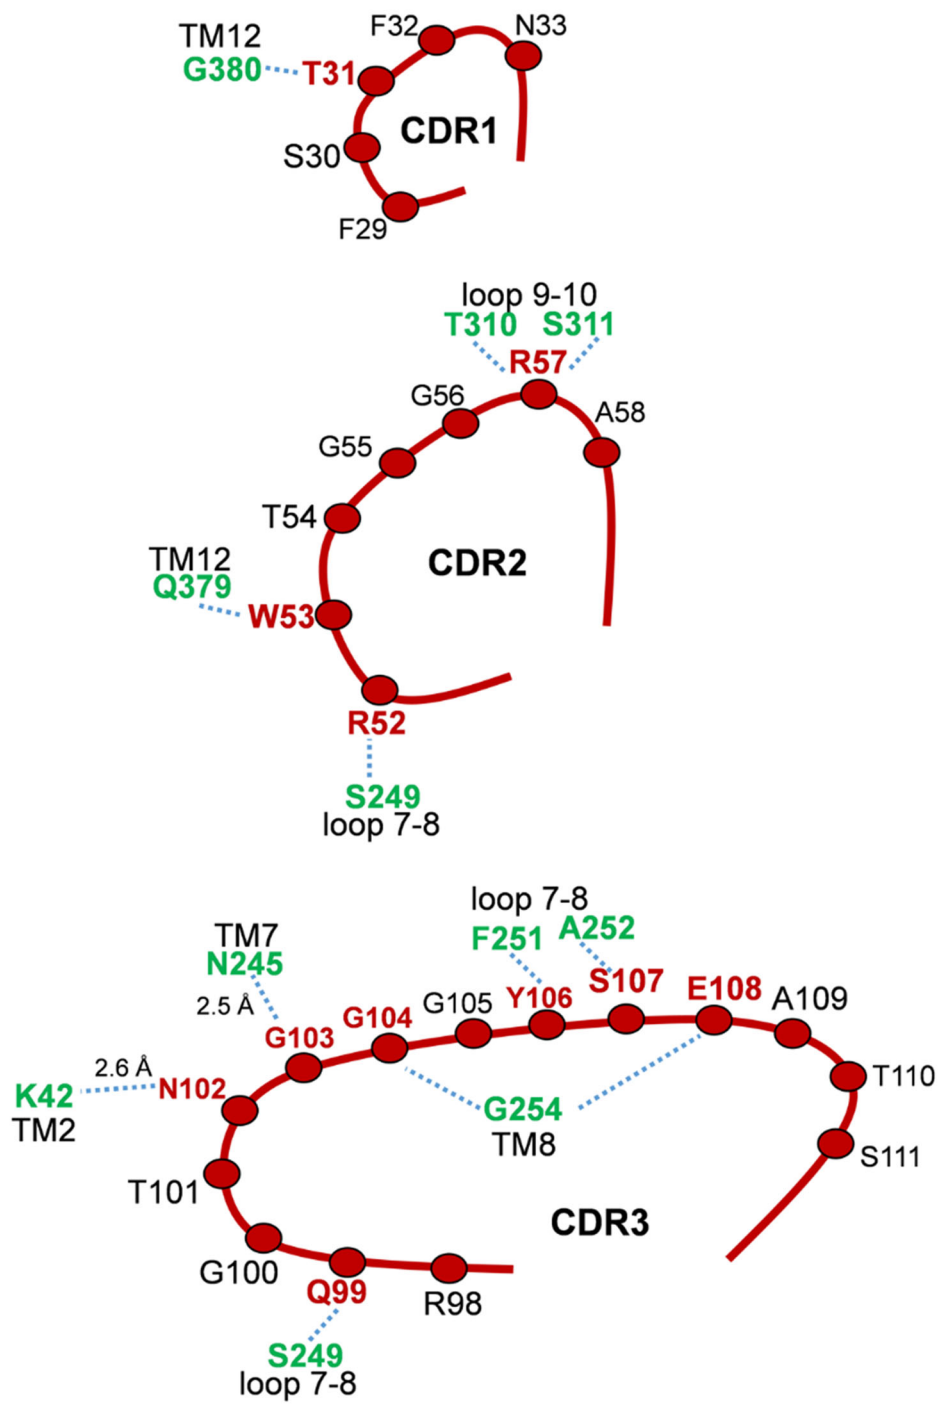

Fig S4

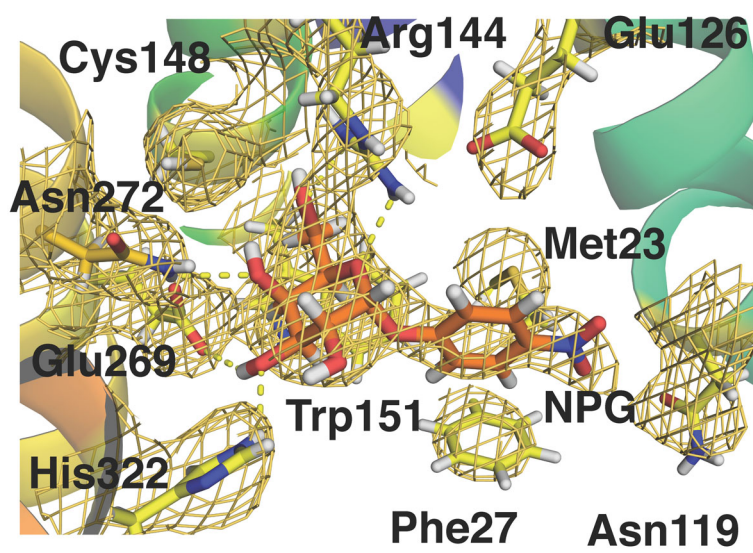

Fig S5

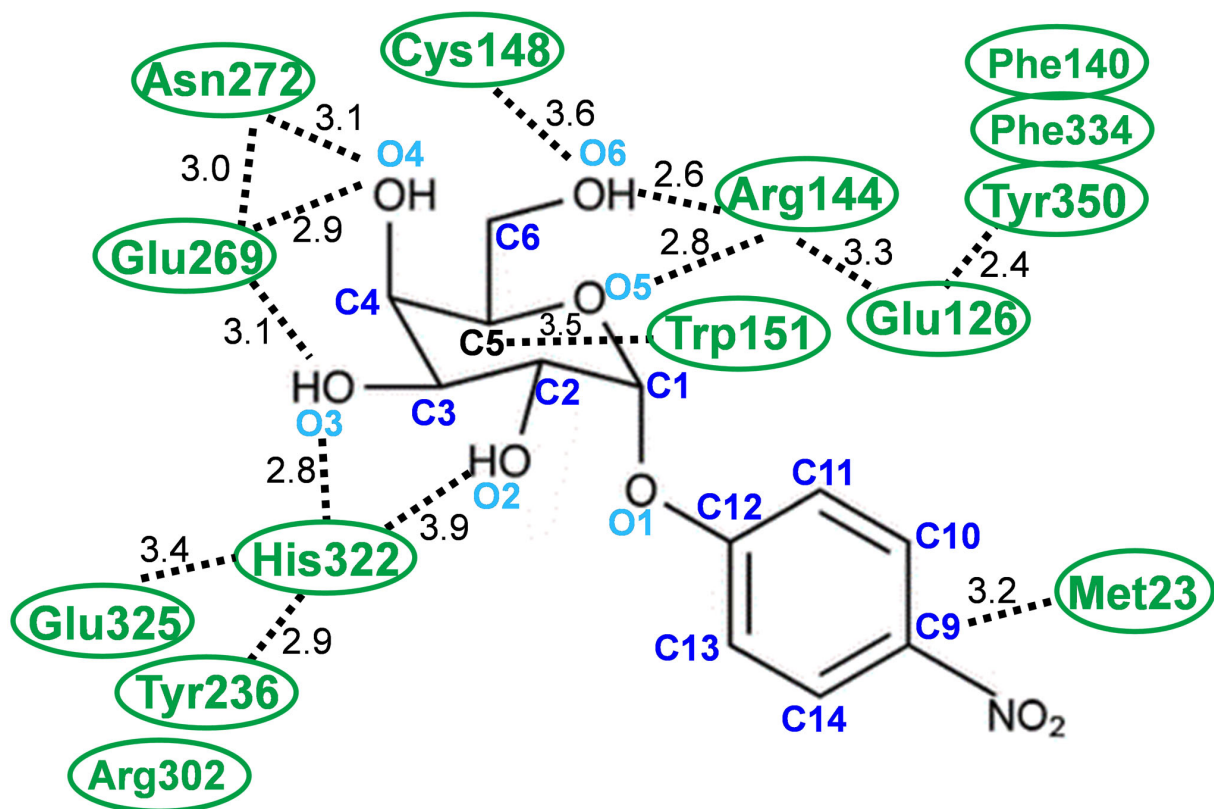

Fig S6

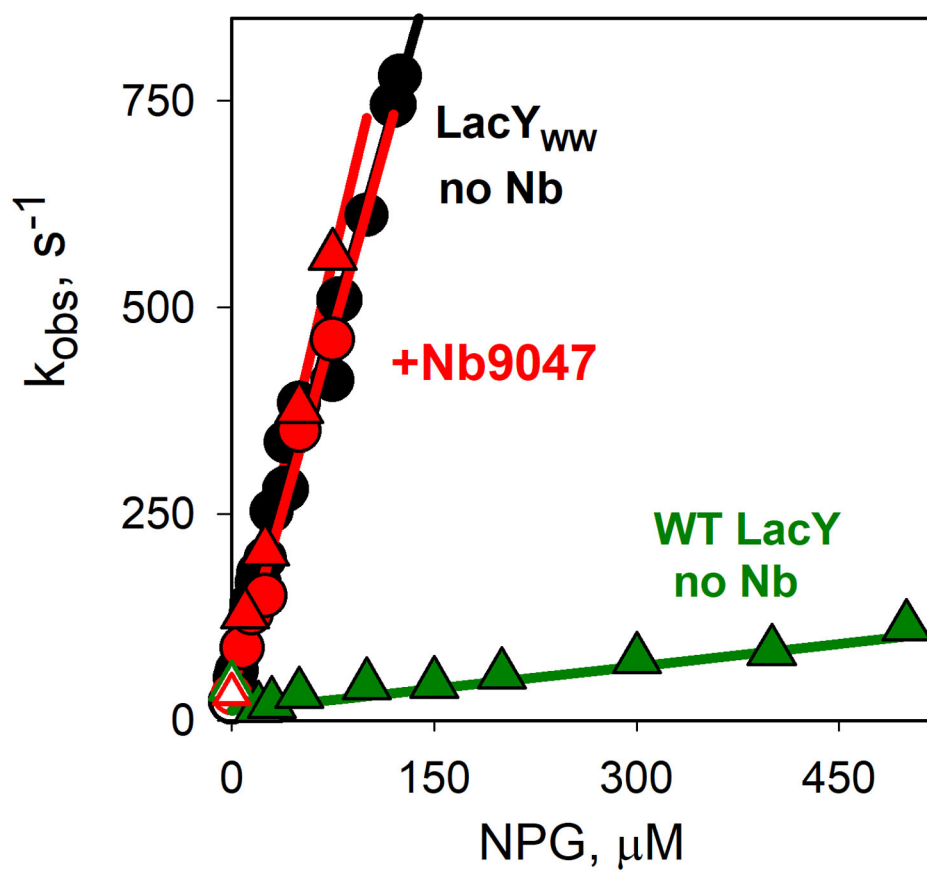

Fig S7
